# Supplementary material
Source: publisher figshare collection journal article supplement (https://acs.figshare.com/ndownloader/files/3973540)
Supplement: Supplementary file 1 [file 3973540]

## EFFECT OF PEGYLATION ON SELF-ASSOCIATION OF IFN- $\alpha$ 2b

Angela Mohs', Alexandre Ambrogelly, Xiaoyu Yang, Mark Haverick, Jason K.  
Cheung, Chakravarthy Narasimhan, and Mohammed Shameem<sup>\*</sup>

*Bioprocess Development, Merck Research Laboratories, 2000 Galloping Hill Road, Kenilworth,  
NJ07033*

\*Corresponding author. Tel.: +1 908 740 5417

Email address: mohammed.shameem @merck.com.

**Figure. S1.**

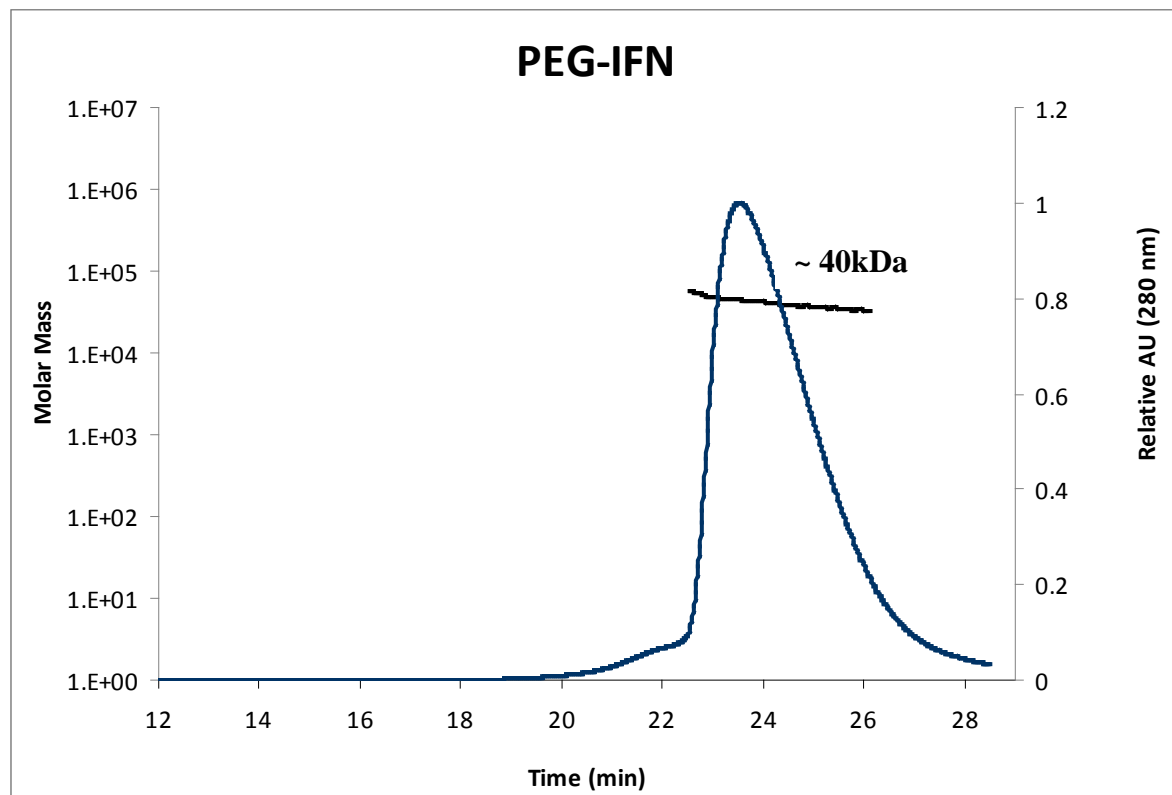

**Fig. S1.** Size exclusion chromatography analysis of PEGIFN- $\alpha$ 2b at 1 mg/ml using Multi Angle Light Scattering (MALLS) and UV280 for detection. PEG-IFN behaves as a monomer (19kDa IFN + 12kDa Peg chain) in the absence of the BS3 cross-linker. Note that the pre-main shoulder at about 22 minutes is due to the presence of di-pegylated IFN (di-PEG-IFN), which is minor side reaction from the manufacturing process.

**Table S1.** Representative size exclusion data for PEGIFN at three different concentrations

| Elution Peak | Concentration |           |           |
|--------------|---------------|-----------|-----------|
|              | 0.1 mg/mL     | 0.3 mg/mL | 1.2 mg/mL |
| di-PEG-IFN   | 4.7           | 5.1       | 4.8       |
| Mono-PEG-IFN | 94.0          | 93.6      | 93.3      |
| IFN          | 1.3           | 1.4       | 1.8       |
